# Supplementary material for: Neurodevelopmental outcomes following late and moderate prematurity: a population-based cohort study
Source: PubMed Central journal article supplement (PMC4484499; doi:10.1136/archdischild-2014-307684), 2015-04-01
Supplement: fetalneonatal-2014-307684-s1.pdf [file fetalneonatal-2014-307684-s1.pdf]

**APPENDIX: Composition of the Socio-Economic Status Index (SES-Index).**

Table A1 shows the composition of the SES-Index score and the contribution of each risk factor to the composite score. Where there were missing data for highest educational qualification, mothers’ age at leaving continuous education was used as a proxy measure. For occupation, the risk status of mothers who rated themselves as not in paid employment as a result of as looking after their family was coded using receipt of means-tested benefits as a proxy measure. A total SES-Index score was computed for each mother which was used to classify overall socio-economic risk as low, moderate and high.

Table A1. Composition of the Socio-Economic Status Index (SES-Index)

| <b>Maternal risk indicator</b>                            | <b>Low risk<br/>Score=0</b>                                   | <b>Mild<br/>Score=1</b>                                  | <b>Moderate<br/>Score=2</b>         | <b>High<br/>Score=3</b>     |
|-----------------------------------------------------------|---------------------------------------------------------------|----------------------------------------------------------|-------------------------------------|-----------------------------|
| <b>EDUCATION:<br/>Highest qualification</b>               | Degree or equivalent                                          | A Level or equivalent                                    | GCSE Grade A-C or equivalent        | GCSE ≤Grade D or equivalent |
| <i>If missing, use age at end of continuous education</i> | <i>(≥19y)</i>                                                 | <i>(18y-21y)</i>                                         | <i>(16y-17y)</i>                    | <i>(&lt;16y)</i>            |
| <b>OCCUPATION:<br/>Occupational status</b>                | Class Managerial, professional, or administrative occupations | Intermediate, supervisory, or small employer occupations | Routine or semi-routine occupations | Unemployed or never worked  |
| <i>If housewife, use receipt of means-tested benefits</i> |                                                               | <i>Not claiming benefits</i>                             |                                     | <i>Claiming benefits</i>    |
| <b>SOCIAL SUPPORT:<br/>Co-habiting status</b>             | Living with a partner                                         | -                                                        | Not living with a partner           | -                           |
| <b>INCOME:<br/>Car ownership</b>                          | Access to ≥1 car in the household                             | -                                                        | No household access to a car        | -                           |
| <b>WEALTH:<br/>Home ownership</b>                         | Home owner/mortgage                                           | -                                                        | Rents/part rents/lives rent free    | -                           |
| <b>Total SES-Index score</b>                              | <b>Scores 0-2</b>                                             | -                                                        | <b>Scores 3-5</b>                   | <b>Scores ≥6</b>            |
